# Supplementary material for: Nanostructure-induced L10-ordering of twinned single-crystals in CoPt ferromagnetic nanowires
Source: Royal Society of Chemistry journal article supplement (doi:10.1039/d2na00626j), 2022-01-01
Supplement: d2na00626j1.pdf [file d2na00626j1.pdf]

## Supplementary Information

# Nanostructure-induced $L1_0$ -ordering of twinned single-crystals in CoPt ferromagnetic nanowires

Ryo Toyama,<sup>a</sup> Shiro Kawachi,<sup>b,c,d</sup> Jun-ichi Yamaura,<sup>b,c</sup> Takeshi Fujita,<sup>e</sup> Youichi Murakami,<sup>c</sup> Hideo Hosono<sup>b</sup> and Yutaka Majima<sup>\*a,b</sup>

<sup>a</sup> *Laboratory for Materials and Structures, Institute of Innovative Research, Tokyo Institute of Technology, Yokohama, Kanagawa 226-8503, Japan*

<sup>b</sup> *Materials Research Center for Element Strategy, Tokyo Institute of Technology, Yokohama, Kanagawa 226-8503, Japan*

<sup>c</sup> *Institute of Materials Structure Science, High Energy Accelerator Research Organization (KEK), Tsukuba, Ibaraki 305-0801, Japan*

<sup>d</sup> *Graduate School of Science, University of Hyogo, Kamigori, Hyogo 678-1297, Japan*

<sup>e</sup> *School of Environmental Science and Engineering, Kochi University of Technology, Kami, Kochi 782-8502, Japan*

*\*E-mail: majima@mssl.titech.ac.jp*

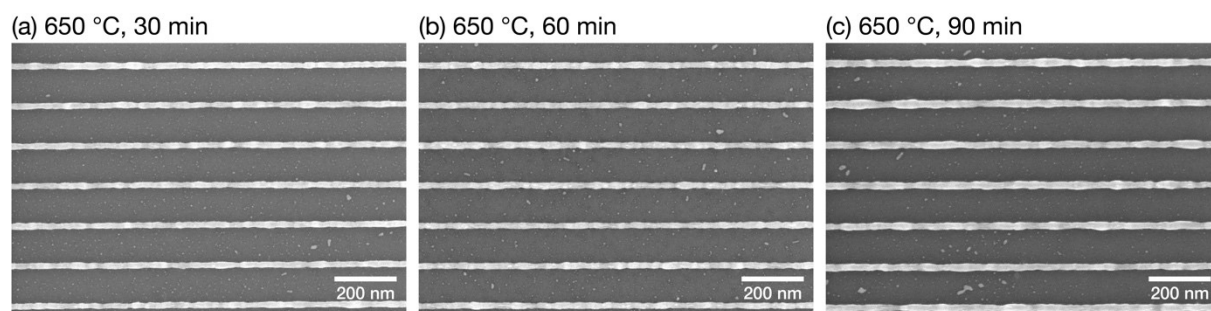

**Fig. S1.** Typical top-view scanning electron microscope (SEM) images of  $[\text{Co} (3.6 \text{ nm})/\text{Pt} (4.8 \text{ nm})]_6$  multilayer nanowires on  $\text{Si}/\text{SiO}_2$  substrates after annealing at  $650 \text{ }^\circ\text{C}$  for (a) 30 min, (b) 60 min, and (c) 90 min. Part (c) is shown again for easy comparison.

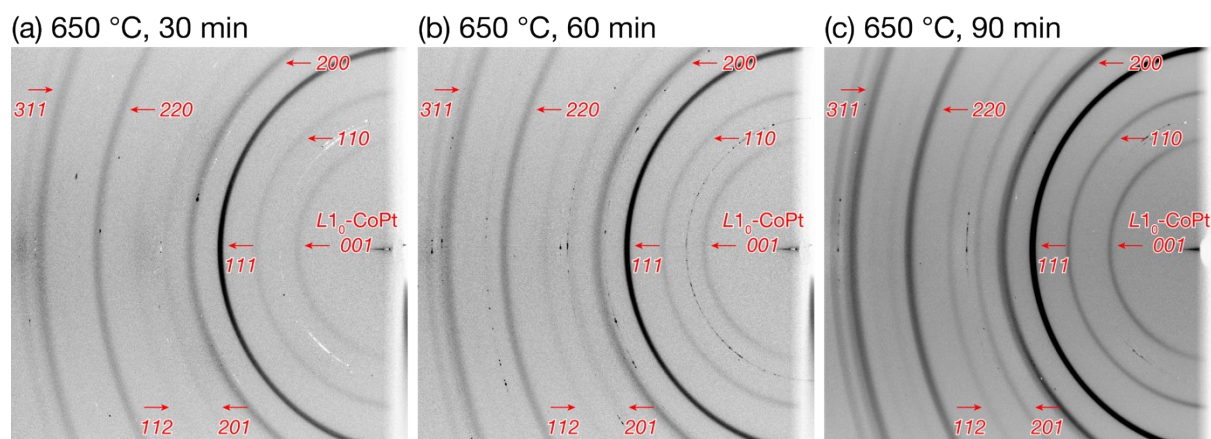

**Fig. S2.** Two-dimensional (2D) grazing incidence X-ray diffraction (GI-XRD) patterns of  $(\text{Co}/\text{Pt})_6$  nanowires on  $\text{Si}/\text{SiO}_2$  substrates after annealing at  $650 \text{ }^\circ\text{C}$  for (a) 30 min, (b) 60 min, and (c) 90 min. The diffraction peaks of  $L1_0\text{-CoPt}$  ( $001$ ,  $110$ ,  $111$ ,  $200$ ,  $201$ ,  $112$ ,  $220$ , and  $311$ ) are indicated by red arrows. Part (c) is shown again for easy comparison.
